# Supplementary material for: Local Field Potential Recordings Using a Deep Brain Stimulation Device: An Open-Source Signal Processing Pipeline
Source: Research Square preprint supplement (doi:10.21203/rs.3.rs-8022883/v1), 2025-11-20
Supplement: Supplementary file 1 [file c09fbcaa6d52c7dbca8f4caf.docx]

**
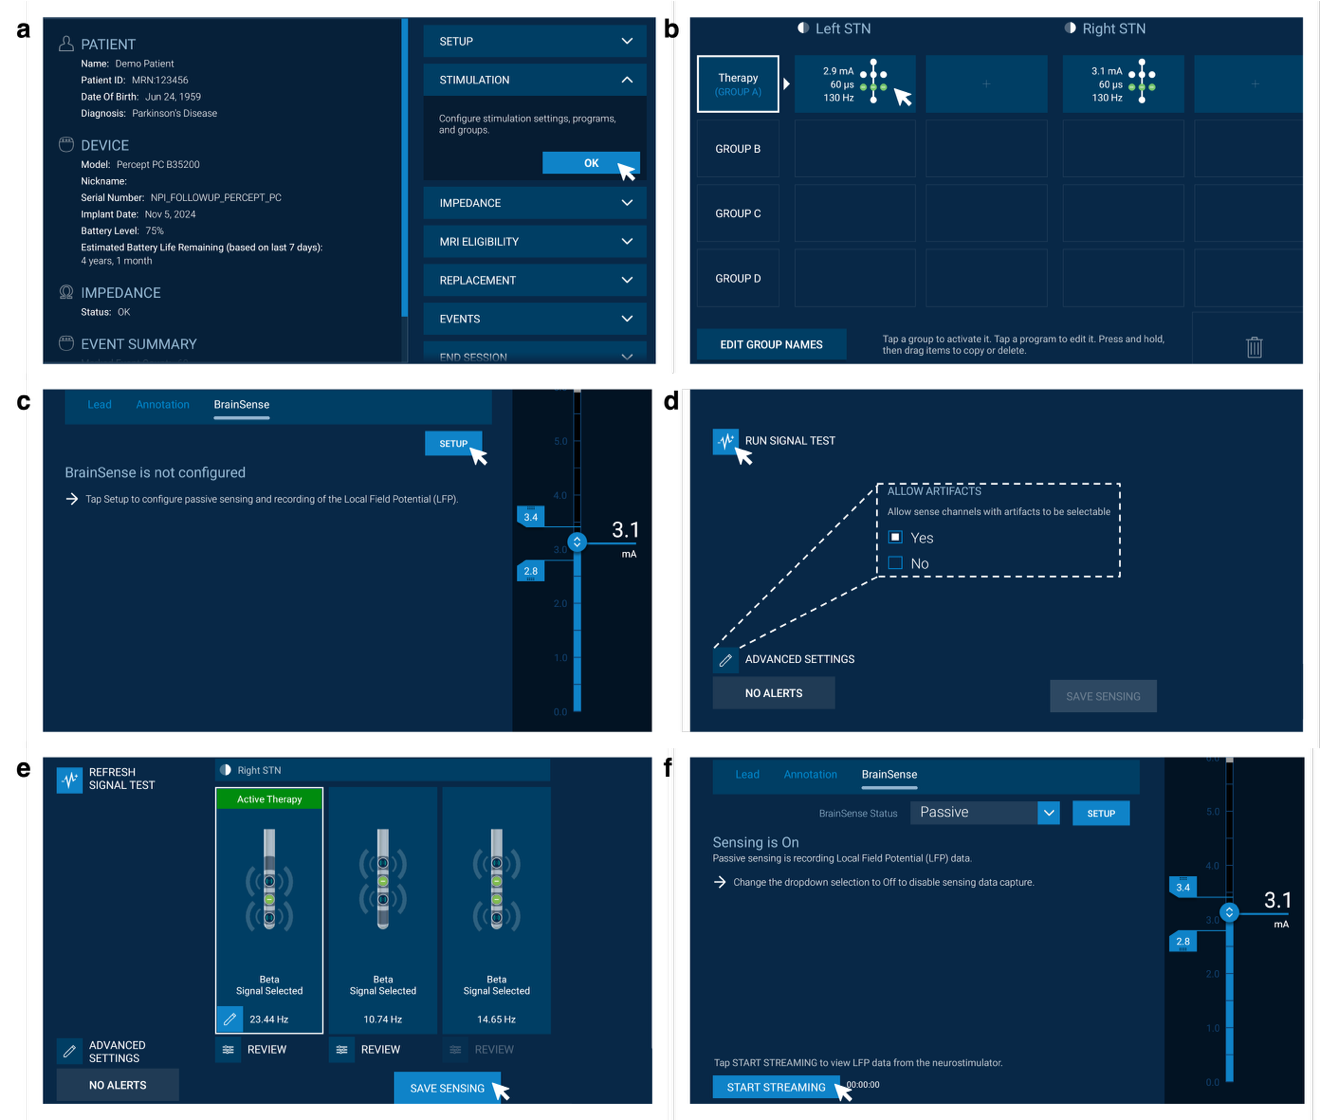
**

**Supplementary Figure 1.** Screenshots from the Medtronic tablet illustrating the steps required to configure BrainSense™ Streaming mode for local field potentials (LFP) recordings. **a** In the main menu, access the stimulation icon to begin the setup process. **b** Access the stimulation group you wish to configure BrainSense on. **c** Select BrainSense setup to proceed with the configuration options. **d** In advanced settings, allow sense channels with artefacts to be selectable, then run the test signal to verify functionality. **e** Select the BrainSense configuration you wish to use, noting that the indicated frequencies (e.g., 23.44 Hz, 10.74 Hz, 14.65 Hz) correspond to manually defined peaks, with power displayed in real-time on the tablet during LFP recordings. **f** BrainSense is configured and ready to be used.

**
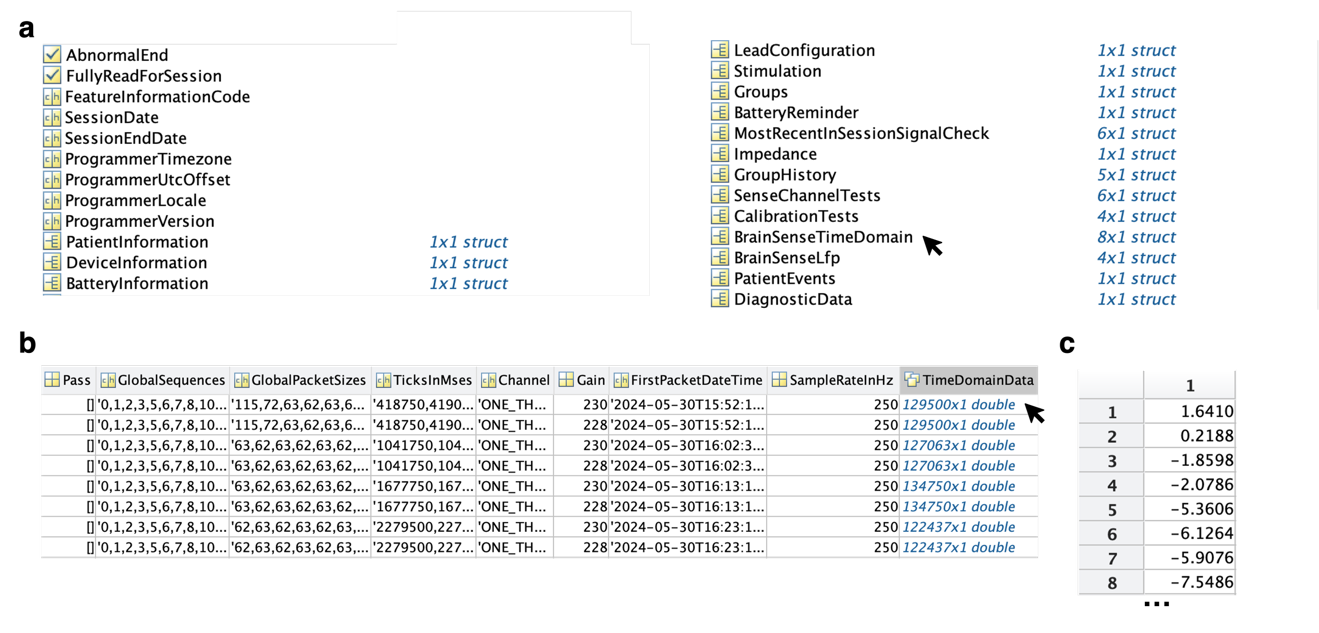
Supplementary Figure 2:** JSON extraction structure. **a** *data* structure in which BrainSense™ streaming data is stored in *BrainSenseTimeDomain*. **b** *BrainSenseTimeDomain* field in which each row corresponds to a specific recording. Raw LFP recordings are stored as matrices in the *TimeDomainData* column. **c** Eight first LFP samples recorded.
